# Supplementary material
Source: Springer Nature journal article supplement (https://www.springermedizin.de/resource/supplementary/12990_2009_256_MOESM3_ESM.pdf/9612896)

**A**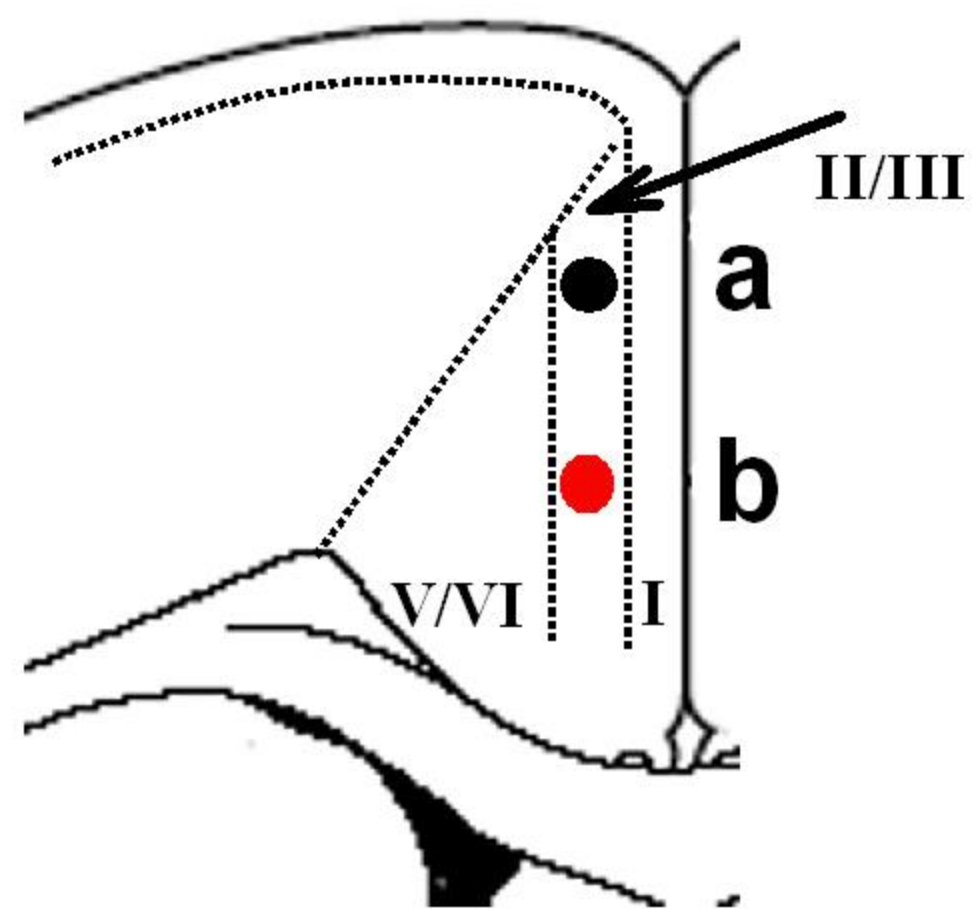**a****B**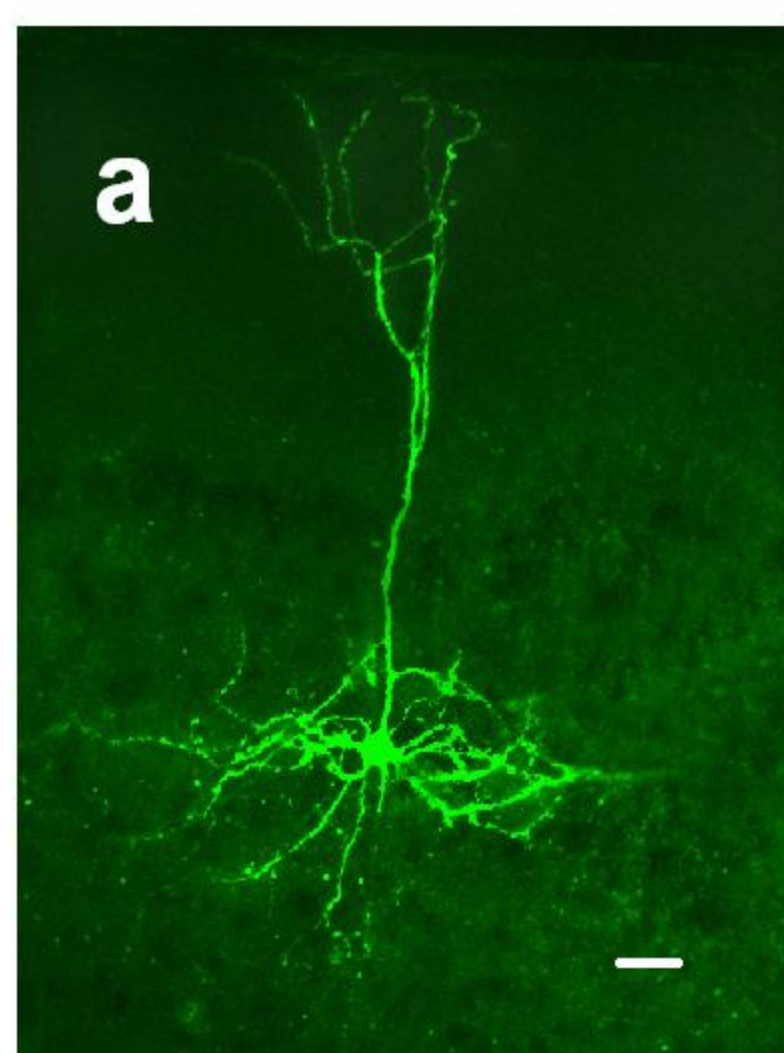**b**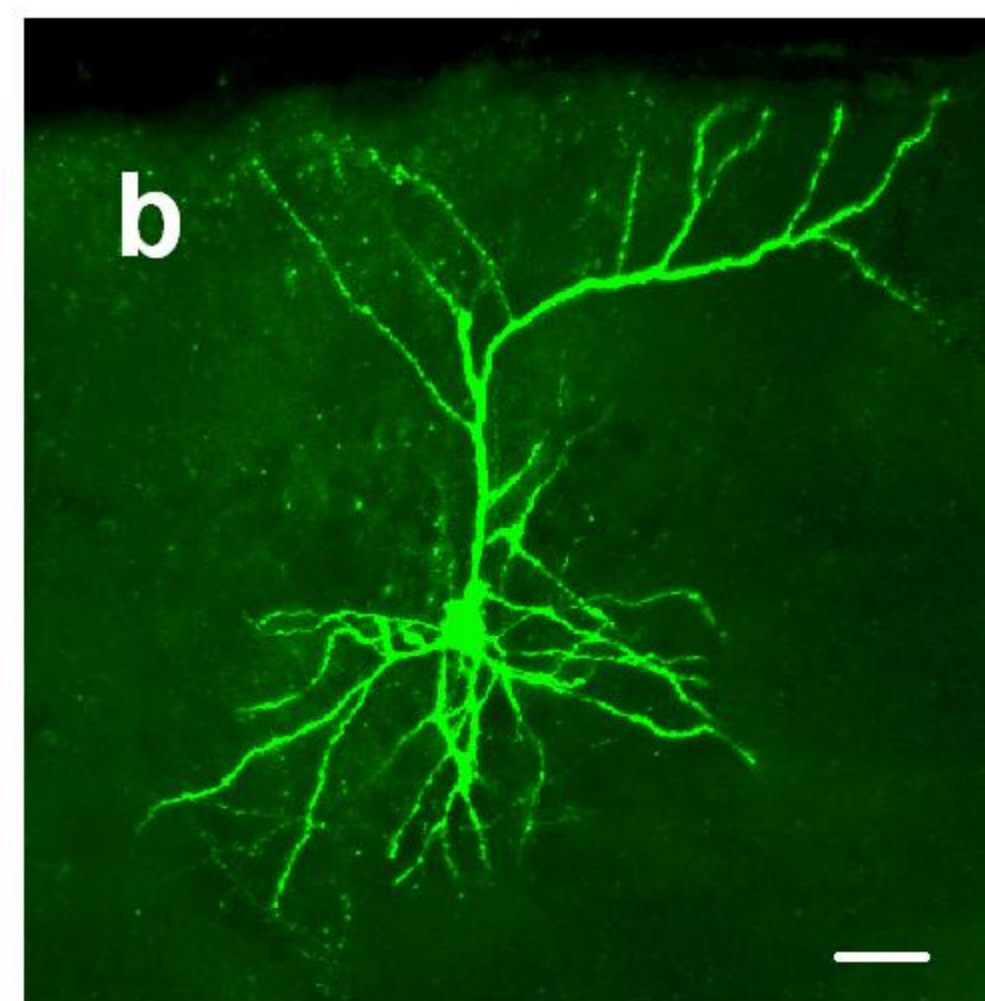**C**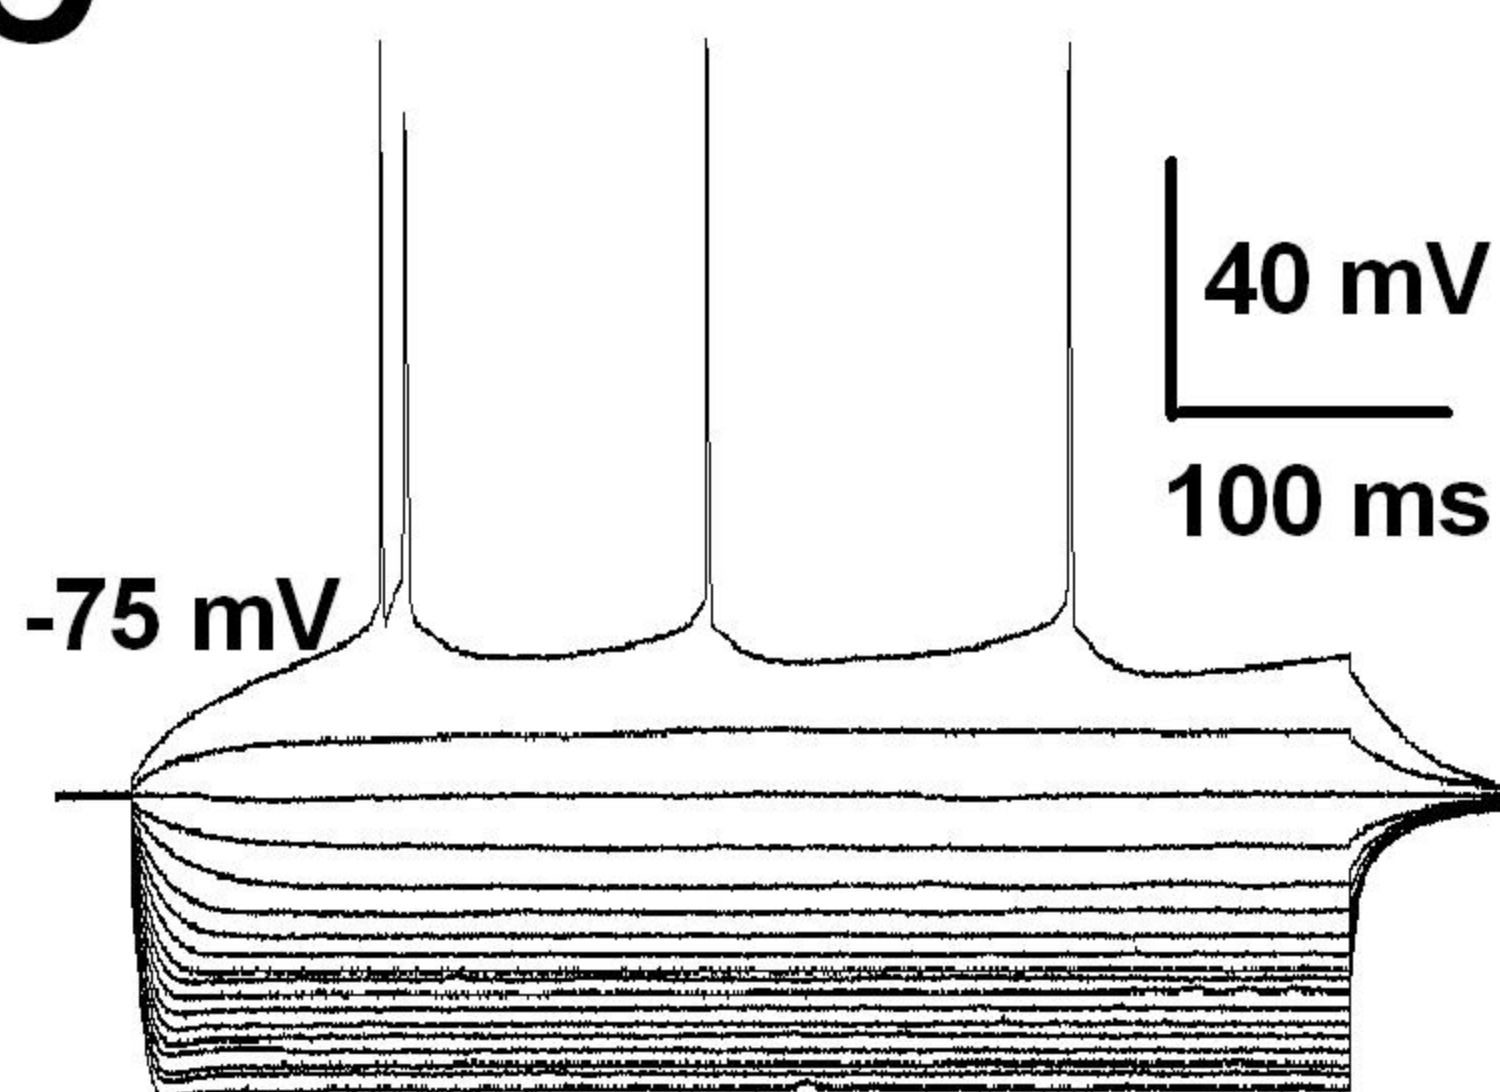**D**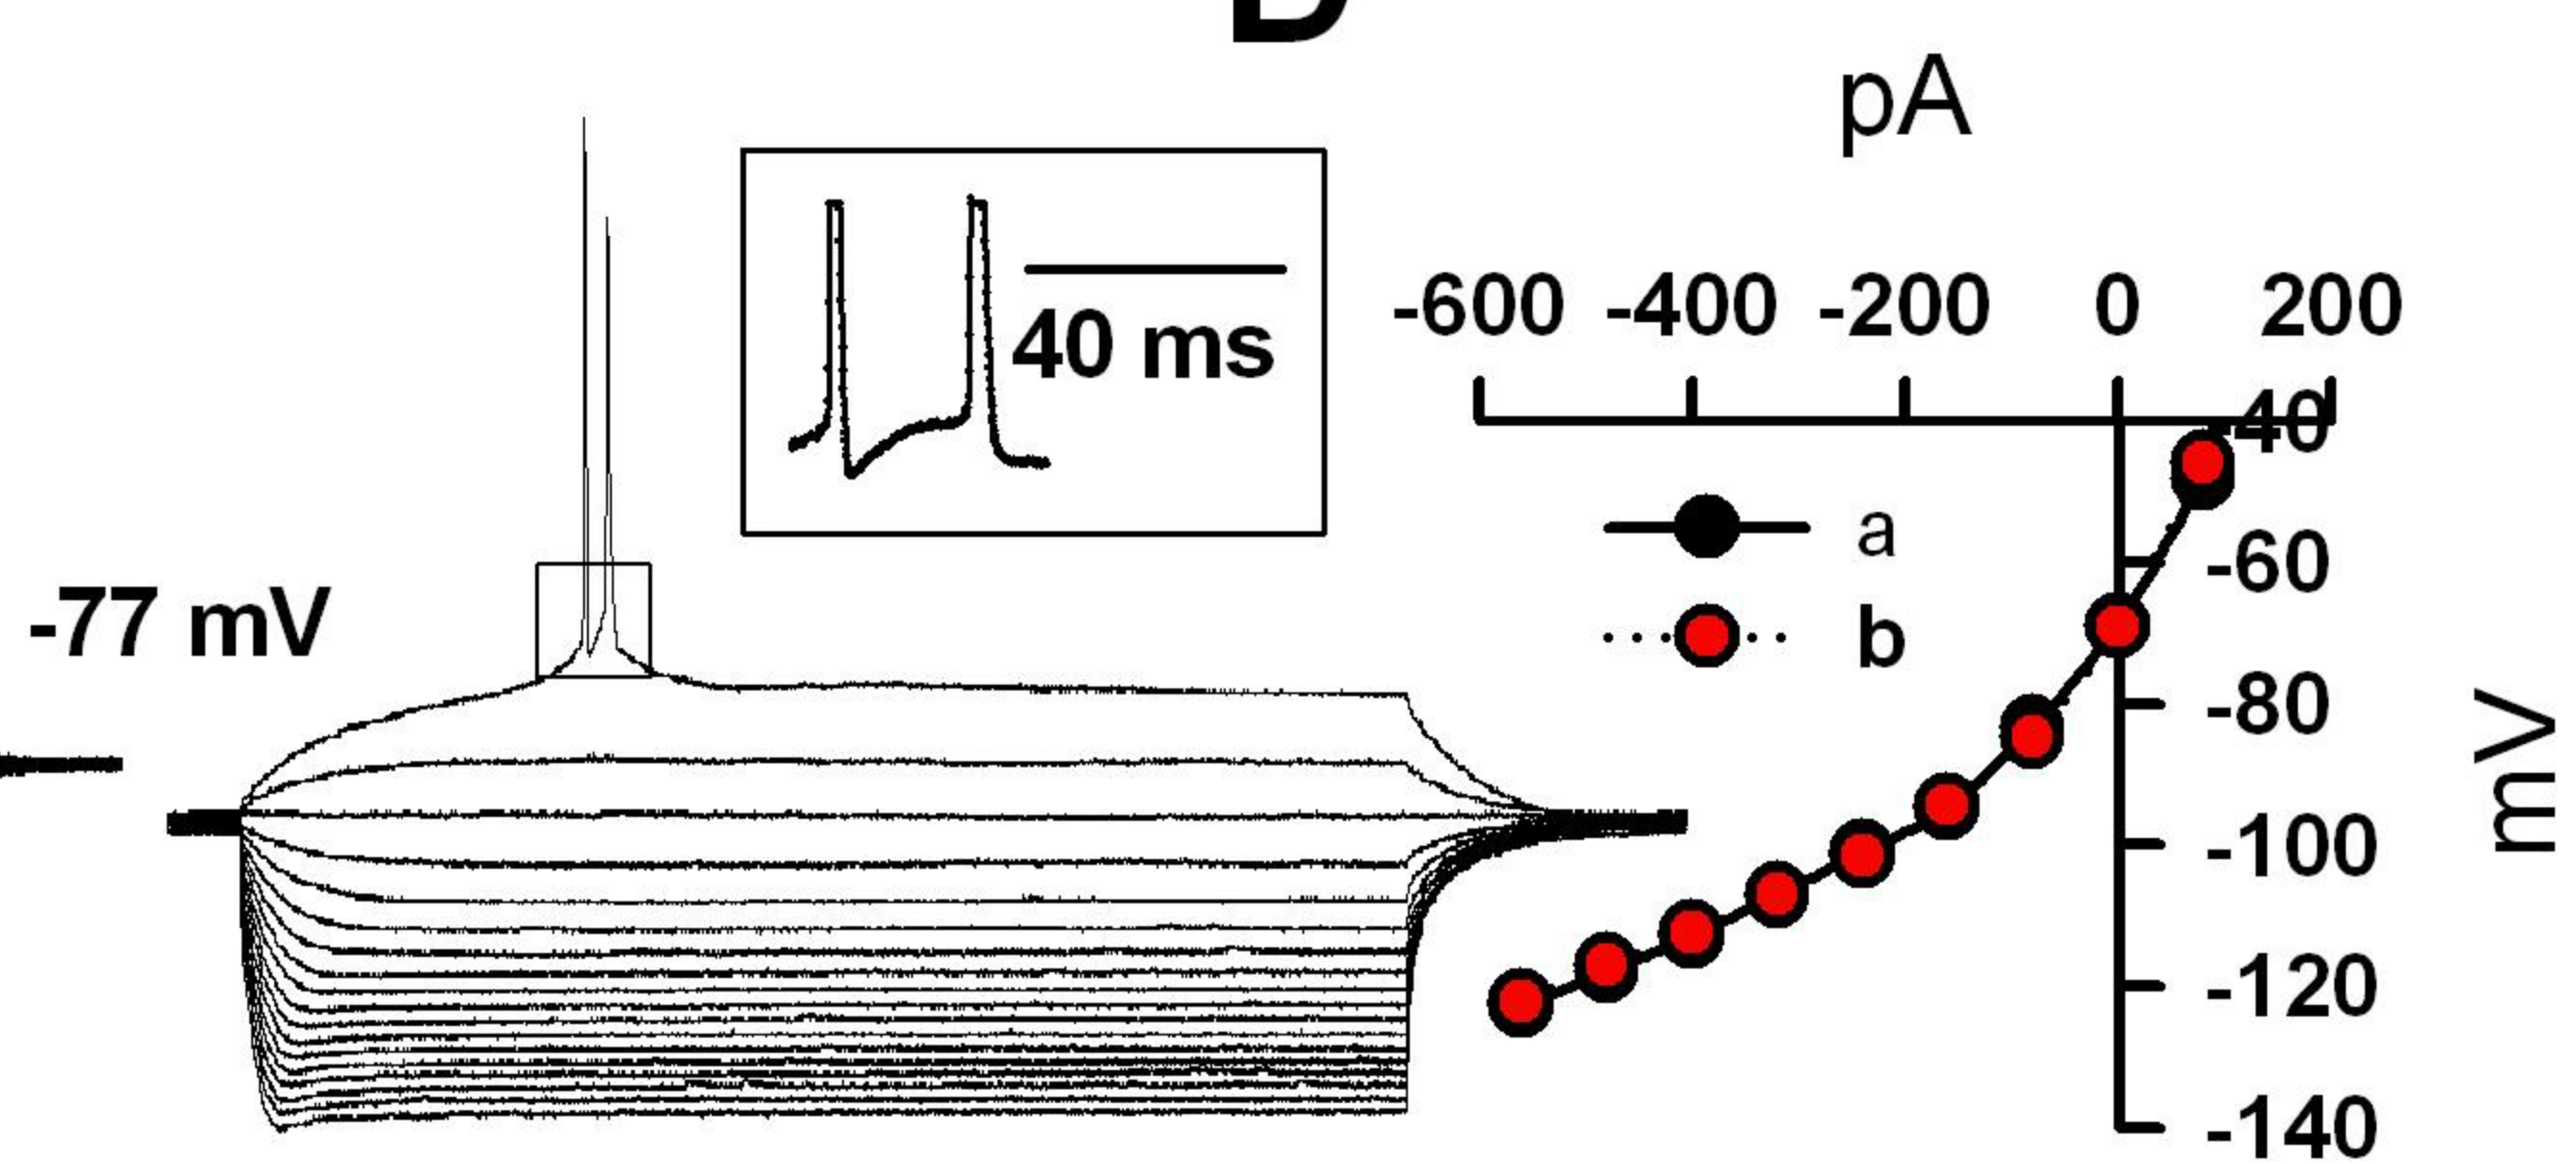**E**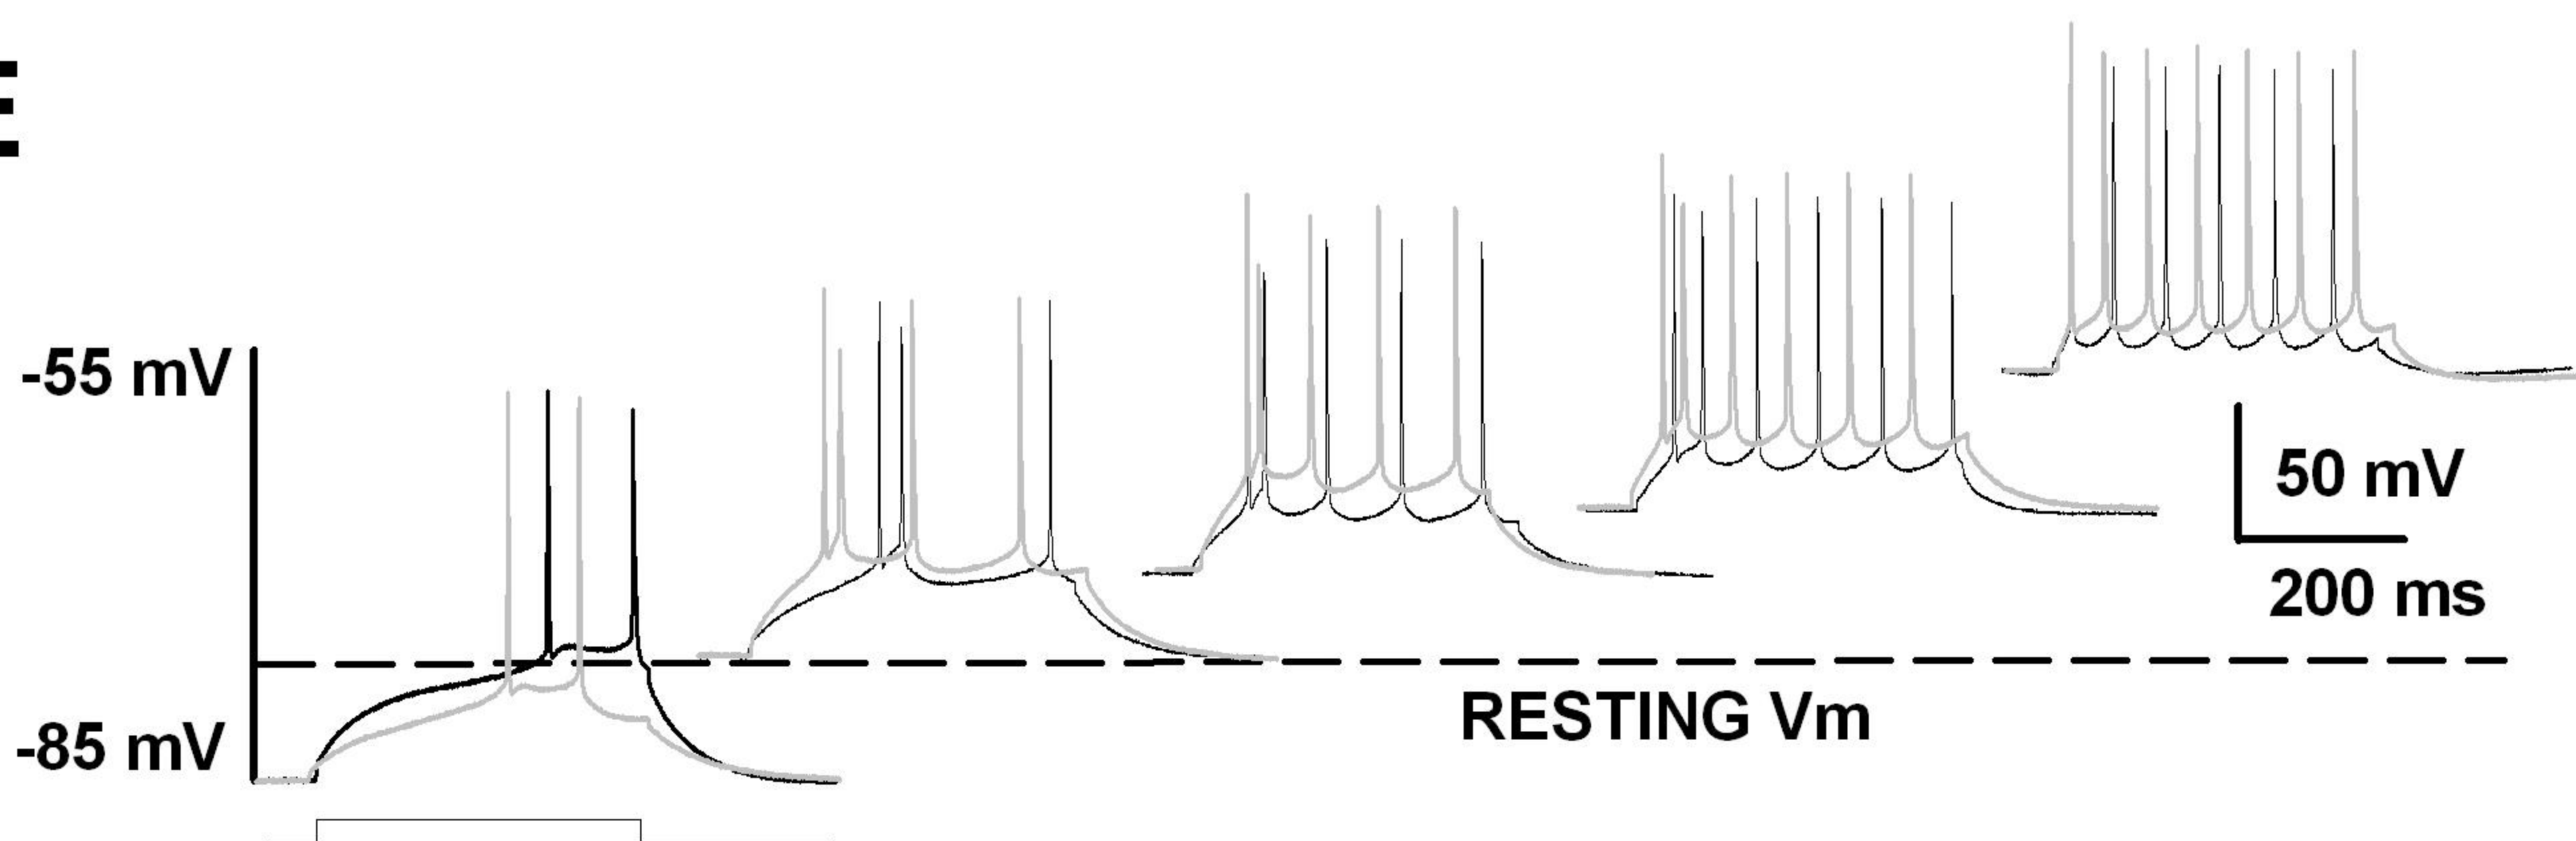**F**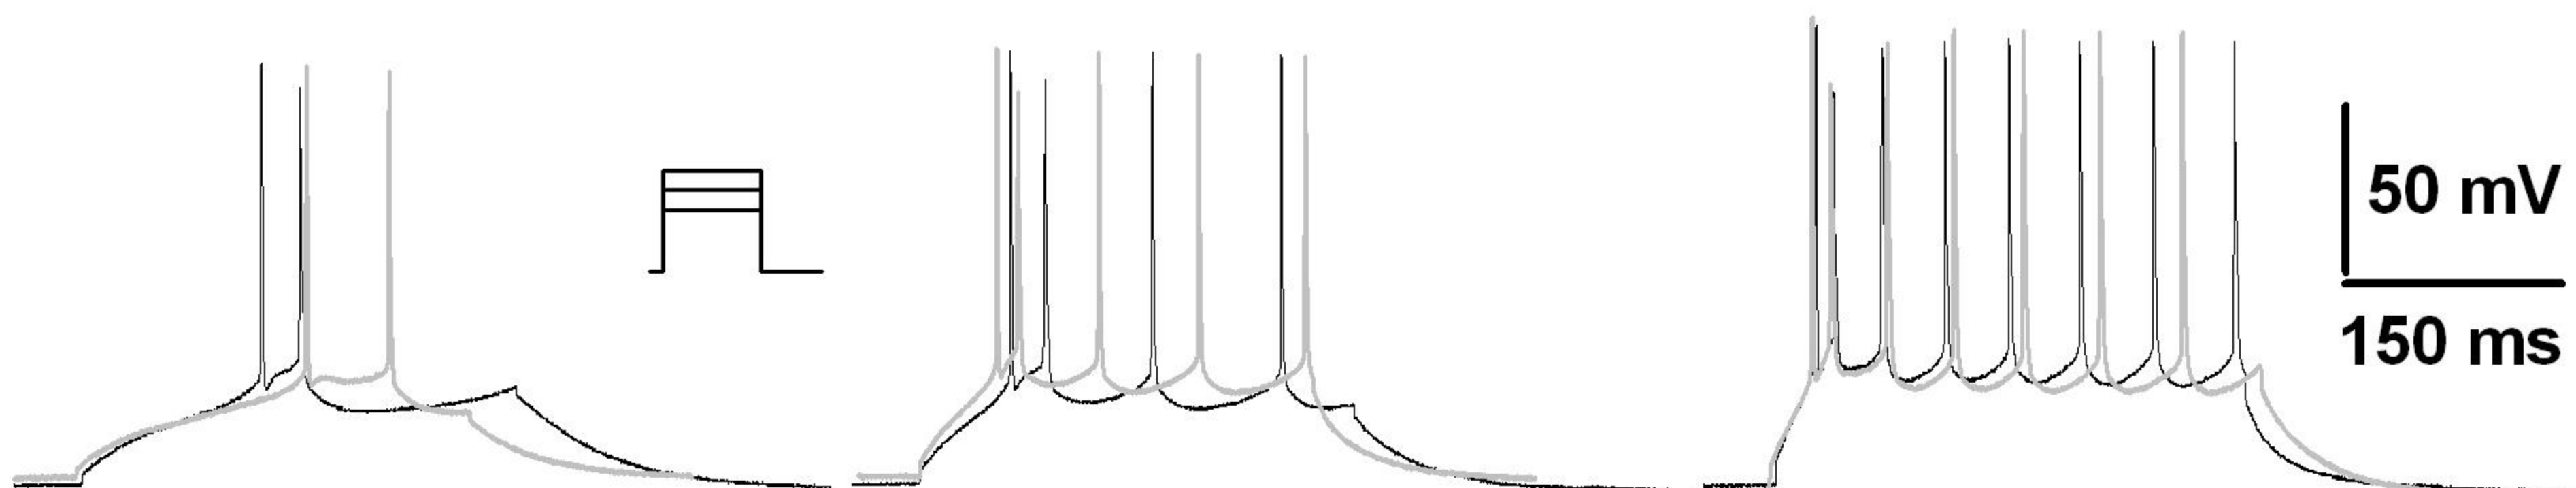

Supplement: MOESM3 [file 9612896]
